# Supplementary material
Source: HighWire-hosted journal article supplement (https://cmaj.ca/highwire/filestream/58151/field_highwire_adjunct_files/0/cvb-croome-online_appendix_1.pdf)
Supplement: cvb-croome-online_appendix_1.pdf [file cvb-croome-online_appendix_1.pdf]

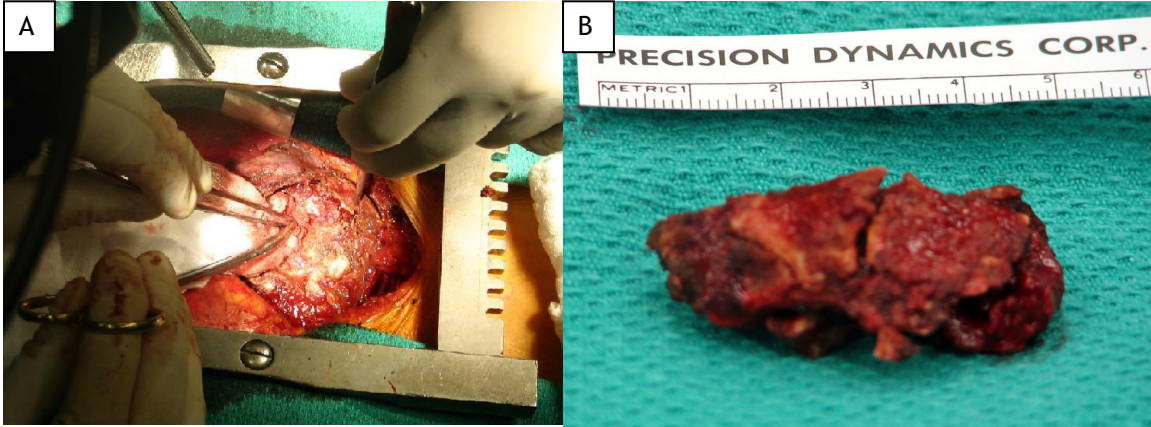

---

**Appendix 1:** (A) Intraoperative photograph demonstrating a calcified cyst with diffuse pericardial calcification along the anterior aspect of the heart. (B) Pathological specimen of the calcified cyst. No acid-fast bacilli were isolated.

---
